# Supplementary material for: Effect of pre-freezing and saccharide types in freeze-drying of siRNA lipoplexes on gene-silencing effects in the cells by reverse transfection
Source: PubMed Central journal article supplement — Mol Med Rep. 2020 Aug 5;22(4):3233–44. doi: 10.3892/mmr.2020.11419 (PMC7453497; doi:10.3892/mmr.2020.11419), 2020-08-05

Figure S1. Appearance of cakes after freeze-drying and vacuum-drying in trehalose and sucrose solution in a 12-well plate. A total of 125  $\mu$ l of 10, 25, 50, 100, or 150 mM (0.43, 1.1, 2.1, 4.3 and 6.4 mg) trehalose or sucrose solution were transferred to 12-well plates, followed by (A) freeze-drying or (B) vacuum-drying.

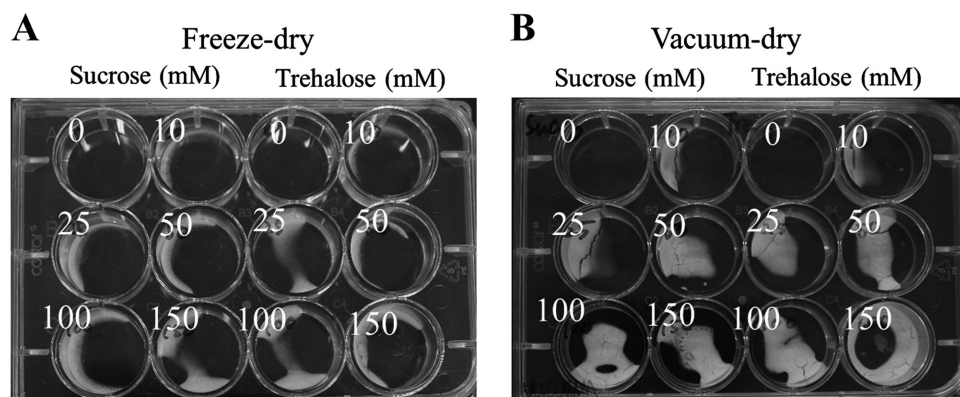

Supplement: Supplementary_Data.pdf [file Supplementary_Data.pdf]
